# Supplementary material
Source: HighWire-hosted journal article supplement (https://bmjopen.bmj.com/content/10/7/e037065)
Supplement: inline-supplementary-material-1 [file inline-supplementary-material-1.pdf]

## Appendix 1. Raw data from the websites

| <i>Raw data from the Websites retrieved by search engines according to order of retrieving</i>                                                                                                                                      |                 |         |         |         |
|-------------------------------------------------------------------------------------------------------------------------------------------------------------------------------------------------------------------------------------|-----------------|---------|---------|---------|
| URL                                                                                                                                                                                                                                 | Bermúdez-Tamayo | DISCERN | INFLESZ | HONcode |
| 1. <a href="https://infoeuma.com/enfermedades-reumaticas/fibromialgia/">https://infoeuma.com/enfermedades-reumaticas/fibromialgia/</a>                                                                                              | 34              | 25      | 48,61   | NO      |
| 2. <a href="https://www.cun.es/enfermedades-tratamientos/enfermedades/fibromialgia">https://www.cun.es/enfermedades-tratamientos/enfermedades/fibromialgia</a>                                                                      | 28              | 23      | 51,67   | NO      |
| 3. <a href="https://www.mayoclinic.org/es-es/diseases-conditions/fibromyalgia/symptoms-causes/syc-20354780">https://www.mayoclinic.org/es-es/diseases-conditions/fibromyalgia/symptoms-causes/syc-20354780</a>                      | 49              | 41      | 50,95   | YES     |
| 4. <a href="https://cuidateplus.marca.com/enfermedades/musculos-y-huesos/fibromialgia.html">https://cuidateplus.marca.com/enfermedades/musculos-y-huesos/fibromialgia.html</a>                                                      | 36              | 28      | 48,35   | NO      |
| 5. <a href="https://es.wikipedia.org/wiki/Fibromialgia">https://es.wikipedia.org/wiki/Fibromialgia</a>                                                                                                                              | 35              | 45      | 56,63   | NO      |
| 6. <a href="https://medlineplus.gov/spanish/ency/article/000427.htm">https://medlineplus.gov/spanish/ency/article/000427.htm</a>                                                                                                    | 45              | 34      | 55,84   | NO      |
| 7. <a href="http://espanol.arthritis.org/espanol/disease-center/fibromialgia/">http://espanol.arthritis.org/espanol/disease-center/fibromialgia/</a>                                                                                | 34              | 26      | 53,67   | NO      |
| 8. <a href="https://portal.hospitalclinic.org/enfermedades/fibromialgia">https://portal.hospitalclinic.org/enfermedades/fibromialgia</a>                                                                                            | 42              | 33      | 48,33   | NO      |
| 9. <a href="https://www.kernpharma.com/es/blog/todo-lo-que-debes-saber-sobre-la-fibromialgia">https://www.kernpharma.com/es/blog/todo-lo-que-debes-saber-sobre-la-fibromialgia</a>                                                  | 33              | 29      | 58,72   | NO      |
| 10. <a href="http://muysaludable.sanitas.es/salud/la-fibromialgia-causas-sintomas-tratamientos/">http://muysaludable.sanitas.es/salud/la-fibromialgia-causas-sintomas-tratamientos/</a>                                             | 29              | 29      | 46,54   | NO      |
| 11. <a href="https://espanol.womenshealth.gov/a-z-topics/fibromyalgia">https://espanol.womenshealth.gov/a-z-topics/fibromyalgia</a>                                                                                                 | 44              | 38      | 59,32   | NO      |
| 12. <a href="https://www.niams.nih.gov/es/informacion-de-salud/fibromialgia">https://www.niams.nih.gov/es/informacion-de-salud/fibromialgia</a>                                                                                     | 40              | 28      | 59,83   | NO      |
| 13. <a href="https://www.fisterra.com/Salud/1infoConse/fibromialgia.asp">https://www.fisterra.com/Salud/1infoConse/fibromialgia.asp</a>                                                                                             | 37              | 31      | 46,36   | YES     |
| 14. <a href="https://kidshealth.org/es/parents/fibromyalgia-esp.html">https://kidshealth.org/es/parents/fibromyalgia-esp.html</a>                                                                                                   | 42              | 27      | 55,44   | NO      |
| 15. <a href="https://www.webconsultas.com/categoria/salud-al-dia/fibromialgia">https://www.webconsultas.com/categoria/salud-al-dia/fibromialgia</a>                                                                                 | 37              | 27      | 54,46   | NO      |
| 16. <a href="https://www.hhp.es/patologias/fibromialgia/">https://www.hhp.es/patologias/fibromialgia/</a>                                                                                                                           | 31              | 26      | 42,05   | NO      |
| 17. <a href="https://www.segundomedico.com/fibromialgia-causas-sintomas-diagnostico-y-tratamiento/">https://www.segundomedico.com/fibromialgia-causas-sintomas-diagnostico-y-tratamiento/</a>                                       | 32              | 24      | 53,21   | NO      |
| 18. <a href="https://es.familydoctor.org/condicion/fibromialgia/">https://es.familydoctor.org/condicion/fibromialgia/</a>                                                                                                           | 39              | 33      | 61,02   | NO      |
| 19. <a href="https://www.sabervivirtv.com/medicina-general/fibromialgia-detectar-enfermedad_434">https://www.sabervivirtv.com/medicina-general/fibromialgia-detectar-enfermedad_434</a>                                             | 31              | 25      | 61,65   | NO      |
| 20. <a href="https://www.fundacion-alborada.org/enfermedades-ambientales/fibromialgia/">https://www.fundacion-alborada.org/enfermedades-ambientales/fibromialgia/</a>                                                               | 31              | 17      | 43,55   | NO      |
| 21. <a href="https://mejorconsalud.com/5-sintomas-tempranos-la-fibromialgia/">https://mejorconsalud.com/5-sintomas-tempranos-la-fibromialgia/</a>                                                                                   | 41              | 22      | 55,16   | YES     |
| 22. <a href="https://cuideo.com/blog-cuideo/ayuda-fibromialgia-todo-lo-que-debes-saber/">https://cuideo.com/blog-cuideo/ayuda-fibromialgia-todo-lo-que-debes-saber/</a>                                                             | 31              | 29      | 53,85   | NO      |
| 23. <a href="https://www.fesemi.org/informacion-pacientes/hemeroteca-salud/enfermedades/fibromialgia-y-fatiga-cronica">https://www.fesemi.org/informacion-pacientes/hemeroteca-salud/enfermedades/fibromialgia-y-fatiga-cronica</a> | 35              | 22      | 55,16   | YES     |
| 24. <a href="https://www.infosalus.com/enfermedades/aparato-locomotor/fibromialgia/que-es-fibromialgia-31.html">https://www.infosalus.com/enfermedades/aparato-locomotor/fibromialgia/que-es-fibromialgia-31.html</a>               | 37              | 23      | 45,25   | NO      |
| 25. <a href="https://www.fundacion-canna.es/fibromialgia">https://www.fundacion-canna.es/fibromialgia</a>                                                                                                                           | 29              | 26      | 44,02   | NO      |

| <i>Websites from Spanish patients associations ordered according to the National Public Registry of Associations</i>                                                                                 |                 |         |         |         |
|------------------------------------------------------------------------------------------------------------------------------------------------------------------------------------------------------|-----------------|---------|---------|---------|
| URL                                                                                                                                                                                                  | Bermúdez-Tamayo | DISCERN | INFLESZ | HONcode |
| 1. <a href="http://www.fibromialgiaautrera.com/quienes_somos.php">http://www.fibromialgiaautrera.com/quienes_somos.php</a>                                                                           | 23              | 18      | 19,12   | NO      |
| 2. <a href="http://www.asociacionapaffer.org/1029-que-es-la-fibromialgia-.html">http://www.asociacionapaffer.org/1029-que-es-la-fibromialgia-.html</a>                                               | 23              | 20      | 56,54   | NO      |
| 3. <a href="http://www.apafima.org/que-es-la-fibromialgia.html">http://www.apafima.org/que-es-la-fibromialgia.html</a>                                                                               | 33              | 22      | 49,49   | NO      |
| 4. <a href="http://afibrose.org/index.php?option=com_content&amp;view=article&amp;id=50&amp;Itemid=41">http://afibrose.org/index.php?option=com_content&amp;view=article&amp;id=50&amp;Itemid=41</a> | 25              | 24      | 32,48   | NO      |
| 5. <a href="https://afipo.webnode.es/">https://afipo.webnode.es/</a>                                                                                                                                 | 27              | 20      | 56,83   | NO      |
| 6. <a href="https://agrafim.weebly.com/fibromialgia-fm.html">https://agrafim.weebly.com/fibromialgia-fm.html</a>                                                                                     | 24              | 23      | 43,88   | NO      |
| 7. <a href="http://www.alaquas.net/afico/">http://www.alaquas.net/afico/</a>                                                                                                                         | 25              | 21      | 53,53   | NO      |
| 8. <a href="https://afimreb.wordpress.com/fibromialgia-2/">https://afimreb.wordpress.com/fibromialgia-2/</a>                                                                                         | 27              | 18      | 48,74   | NO      |
| 9. <a href="http://www.asociacionafcas.es/">http://www.asociacionafcas.es/</a>                                                                                                                       | 29              | 22      | 50,05   | NO      |
| 10. <a href="https://fibromialgiamarinaalta.es.tl/QUE-ES-LA-FIBROMIALGIA.htm">https://fibromialgiamarinaalta.es.tl/QUE-ES-LA-FIBROMIALGIA.htm</a>                                                    | 25              | 26      | 58,24   | NO      |
| 11. <a href="http://avafi.es/?page_id=88">http://avafi.es/?page_id=88</a>                                                                                                                            | 43              | 26      | 50,38   | YES     |
| 12. <a href="https://adafir.wordpress.com/fibromialgia/">https://adafir.wordpress.com/fibromialgia/</a>                                                                                              | 25              | 30      | 55,71   | NO      |
| 13. <a href="http://afa.asofiben.es/?page_id=241">http://afa.asofiben.es/?page_id=241</a>                                                                                                            | 23              | 22      | 49,94   | NO      |
| 14. <a href="http://www.asfiel.org/fibromialgia/">http://www.asfiel.org/fibromialgia/</a>                                                                                                            | 27              | 34      | 54,38   | NO      |
| 15. <a href="https://fibromialgianovelda.es.tl/%BFQue-es-la-Fibromialgia-f-.htm">https://fibromialgianovelda.es.tl/%BFQue-es-la-Fibromialgia-f-.htm</a>                                              | 33              | 27      | 44,25   | NO      |
| 16. <a href="http://fibromialgiasantapola.blogspot.com/p/que-es-la-fibromialgia.html">http://fibromialgiasantapola.blogspot.com/p/que-es-la-fibromialgia.html</a>                                    | 25              | 17      | 48,01   | NO      |
| 17. <a href="http://s619678501.web-inicial.es/qui%C3%A9nes-somos/la-enfermedad/">http://s619678501.web-inicial.es/qui%C3%A9nes-somos/la-enfermedad/</a>                                              | 31              | 23      | 50,07   | NO      |
| 18. <a href="https://punto19.org/fibromialgia">https://punto19.org/fibromialgia</a>                                                                                                                  | 31              | 23      | 47,9    | NO      |
| 19. <a href="http://afibroalba.blogspot.com/">http://afibroalba.blogspot.com/</a>                                                                                                                    | 27              | 21      | 50,92   | NO      |
| 20. <a href="http://afibrotar.es/la-fibromialgia/">http://afibrotar.es/la-fibromialgia/</a>                                                                                                          | 29              | 20      | 42,03   | NO      |
| 21. <a href="http://www.ffclm.es/fibromialgia.php">http://www.ffclm.es/fibromialgia.php</a>                                                                                                          | 25              | 24      | 39,14   | NO      |
| 22. <a href="https://aficrovall.jimdo.com/que-es-la-fibromialgia/">https://aficrovall.jimdo.com/que-es-la-fibromialgia/</a>                                                                          | 35              | 17      | 45,22   | NO      |
| 23. <a href="https://www.ayuntamientoarevalo.es/03c_la_villa/08_asociaciones/c08aso_afemar_07.htm">https://www.ayuntamientoarevalo.es/03c_la_villa/08_asociaciones/c08aso_afemar_07.htm</a>          | 23              | 20      | 54,31   | NO      |
| 24. <a href="https://afibrosal.org/enfermedades/fibromialgia">https://afibrosal.org/enfermedades/fibromialgia</a>                                                                                    | 33              | 17      | 52,19   | NO      |
| 25. <a href="https://afibroal.webnode.es/laenfermedad/">https://afibroal.webnode.es/laenfermedad/</a>                                                                                                | 25              | 18      | 25,01   | NO      |
| 26. <a href="https://fexaf.wordpress.com/fibromialgia-fm/">https://fexaf.wordpress.com/fibromialgia-fm/</a>                                                                                          | 27              | 22      | 42,95   | NO      |
| 27. <a href="http://www.afifasen.es/fibromialgia/">http://www.afifasen.es/fibromialgia/</a>                                                                                                          | 27              | 20      | 54,4    | NO      |
| 28. <a href="https://www.asafa.es/">https://www.asafa.es/</a>                                                                                                                                        | 31              | 21      | 54,89   | NO      |
| 29. <a href="https://www.fibroparla.es/">https://www.fibroparla.es/</a>                                                                                                                              | 27              | 22      | 54,17   | NO      |
| 30. <a href="https://www.afifuen.com/acerca-de/fm/">https://www.afifuen.com/acerca-de/fm/</a>                                                                                                        | 25              | 17      | 65,05   | NO      |
| 31. <a href="http://www.fibromialgia.cat/cast/frames.htm">http://www.fibromialgia.cat/cast/frames.htm</a>                                                                                            | 39              | 34      | 59,59   | YES     |
| 32. <a href="http://afibrocat.barcelona.ppe.entitats.diba.cat/sobre-la-fibromialgia/">http://afibrocat.barcelona.ppe.entitats.diba.cat/sobre-la-fibromialgia/</a>                                    | 29              | 17      | 53,62   | NO      |

| <i>Raw data from the Websites of Spanish patients associations ordered according to the National Public Registry of Associations (continuation)</i> |                                                                                                                                                                     |                        |                |                |                |
|-----------------------------------------------------------------------------------------------------------------------------------------------------|---------------------------------------------------------------------------------------------------------------------------------------------------------------------|------------------------|----------------|----------------|----------------|
|                                                                                                                                                     | <b>URL</b>                                                                                                                                                          | <b>Bermúdez-Tamayo</b> | <b>DISCERN</b> | <b>INFLESZ</b> | <b>HONcode</b> |
| 33.                                                                                                                                                 | <a href="https://ashofi.org/es/etiologia-2/">https://ashofi.org/es/etiologia-2/</a>                                                                                 | 35                     | 28             | 49,76          | NO             |
| 34.                                                                                                                                                 | <a href="https://fibromialgiabadalona.wordpress.com/la-enfermedad/">https://fibromialgiabadalona.wordpress.com/la-enfermedad/</a>                                   | 25                     | 19             | 55,19          | NO             |
| 35.                                                                                                                                                 | <a href="http://fibrofels.castelldefels.ppe.entitats.diba.cat/es/la-fibromialgia-2/">http://fibrofels.castelldefels.ppe.entitats.diba.cat/es/la-fibromialgia-2/</a> | 25                     | 26             | 50,98          | NO             |
| 36.                                                                                                                                                 | <a href="http://www.afibrocar.com/fibromialgia.php">http://www.afibrocar.com/fibromialgia.php</a>                                                                   | 25                     | 23             | 57,03          | NO             |
| 37.                                                                                                                                                 | <a href="http://fibrofamur.blogspot.com/p/diagnostico.html">http://fibrofamur.blogspot.com/p/diagnostico.html</a>                                                   | 25                     | 26             | 54,36          | NO             |
| 38.                                                                                                                                                 | <a href="https://fibrorioja.org/quienes-somos/fibromialgia/">https://fibrorioja.org/quienes-somos/fibromialgia/</a>                                                 | 25                     | 18             | 50,86          | NO             |
| 39.                                                                                                                                                 | <a href="https://cafpontevedra.es.tl/%BFQUE-ES-LA-FIBROMIALGIA-f-.htm">https://cafpontevedra.es.tl/%BFQUE-ES-LA-FIBROMIALGIA-f-.htm</a>                             | 25                     | 20             | 56,66          | NO             |
| 40.                                                                                                                                                 | <a href="https://afibropo.webnode.es/fibromialgia/">https://afibropo.webnode.es/fibromialgia/</a>                                                                   | 29                     | 18             | 59,82          | NO             |
| 41.                                                                                                                                                 | <a href="http://www.asafima.org/">http://www.asafima.org/</a>                                                                                                       | 31                     | 21             | 59             | NO             |
| 42.                                                                                                                                                 | <a href="http://www.bizi-bide.com/">http://www.bizi-bide.com/</a>                                                                                                   | 31                     | 20             | 43,15          | NO             |
| 43.                                                                                                                                                 | <a href="http://www.afibrolan.org/sobre-la-fibromialgia/">http://www.afibrolan.org/sobre-la-fibromialgia/</a>                                                       | 23                     | 22             | 54,19          | NO             |
| 44.                                                                                                                                                 | <a href="https://fibromialgialasafor.es.tl/%BFQu-e2--es-la-fibromialgia-f--.htm">https://fibromialgialasafor.es.tl/%BFQu-e2--es-la-fibromialgia-f--.htm</a>         | 21                     | 20             | 58,4           | NO             |
| 45.                                                                                                                                                 | <a href="http://redespanolafibromialgia.com/que-es-la-fibromialgia/">http://redespanolafibromialgia.com/que-es-la-fibromialgia/</a>                                 | 33                     | 21             | 52,68          | NO             |

| <i>Raw data from the Websites of Latin America patients associations ordered according to the National Public Registry of Associations</i>                                                          |                 |         |         |         |
|-----------------------------------------------------------------------------------------------------------------------------------------------------------------------------------------------------|-----------------|---------|---------|---------|
| URL                                                                                                                                                                                                 | Bermúdez-Tamayo | DISCERN | INFLESZ | HONcode |
| 46. <a href="http://www.asociacionfibroamerica.org/">http://www.asociacionfibroamerica.org/</a>                                                                                                     | 25              | 33      | 44,91   | NO      |
| 47. <a href="http://www.fibromialgiachile.cl/index.php/tratamientos">http://www.fibromialgiachile.cl/index.php/tratamientos</a>                                                                     | 25              | 21      | 53,33   | NO      |
| 48. <a href="https://fibromialgia.softwaredigitals.com.ve/index.php/%C2%BFqu%C3%A9-es-la-fibromialgia">https://fibromialgia.softwaredigitals.com.ve/index.php/%C2%BFqu%C3%A9-es-la-fibromialgia</a> | 25              | 19      | 51,15   | NO      |
