# Supplementary material
Source: HighWire-hosted journal article supplement (https://bmjopen.bmj.com/content/10/7/e037065)
Supplement: inline-supplementary-material-2 [file inline-supplementary-material-2.pdf]

**Appendix 2.** Comparisons of the INFELSZ with the FLESH ranges.

| IFSZ | INFLEZ             | FLESCHE          | School level     |
|------|--------------------|------------------|------------------|
| 0    | Very difficult     | Very difficult   | College graduate |
| 15   |                    |                  |                  |
| 30   |                    | Difficult        | College          |
| 35   |                    |                  |                  |
| 40   | Slightly difficult | Fairly difficult | 10th-12th grade  |
| 45   |                    |                  |                  |
| 50   | Normal             | Normal           | 8th-9th grade    |
| 55   |                    |                  |                  |
| 60   | Fairly Easy        | Fairly easy      | 7th grade        |
| 65   |                    |                  |                  |
| 70   |                    | Easy             | 6th grade        |
| 75   |                    |                  |                  |
| 80   | Very easy          | Very easy        | 5th grade        |
| 85   |                    |                  |                  |
| 90   |                    |                  |                  |
| 95   |                    |                  |                  |
| 100  |                    |                  |                  |

IFSZ: Flesch-Szigriszt index; FLESCHE: Flesch Reading Ease Score
